# Supplementary material for: gRINN: a tool for calculation of residue interaction energies and protein energy network analysis of molecular dynamics simulations
Source: PubMed Central journal article supplement — Nucleic Acids Res. 2018 May 25;46(Web Server issue):W554–62. doi: 10.1093/nar/gky381 (PMC6030995; doi:10.1093/nar/gky381), 2018-05-25
Supplement: gky381_supplemental_files.pdf [file gky381_supplemental_files.pdf]

## Supplementary Data

### Molecular Dynamics Simulation Protocol for Example Application: Identifying Functional Residues in Trypsin Structure Using gRINN.

The trypsin structure to be simulated was taken from Protein Data Bank (PDB) accession number 3OTJ. The PDB file included both the trypsin enzyme from bovine and an inhibitor (Bovine Pancreatic Trypsin Inhibitor, BPTI). Inhibitor atoms and all other water molecules were removed from the file. The system was solvated using TIP3P water molecules with at least 10 Å padding distance to the periodic boundary box boundary in each direction. Following solvation, the total charge of the system was neutralized by replacing randomly selected water molecules with appropriate amounts of sodium and/or chloride ions. Total ion concentration was set to 0.15 nM.

Following solvation and ionization, the system was subjected to a 10000 steps of energy minimization. Then, the system was simulated in the NPT ensemble for 50 nanoseconds. The temperature and pressure were held constant at 310 K and 1 bar, respectively. Simulations were conducted using NAMD 2.12 simulation engine. The time-step of simulation was 2 fs. Coordinated were saved every 2 ps of simulation time. This results in 50000 frames for a 50 ns long simulation.

### Equilibrium Assessment

It is more sensible to quantify pairwise residue interaction energies in an equilibrated simulation trajectory. Therefore, we assessed equilibrium by calculating the Root Mean Square Deviation (RMSD) for all frames included in the trajectory to the reference (initial) frame (Figure S1). The portion of simulation between 25 and 50 nanoseconds was then selected for interaction energy calculation. This portion was saved to another DCD file and used as input to gRINN.

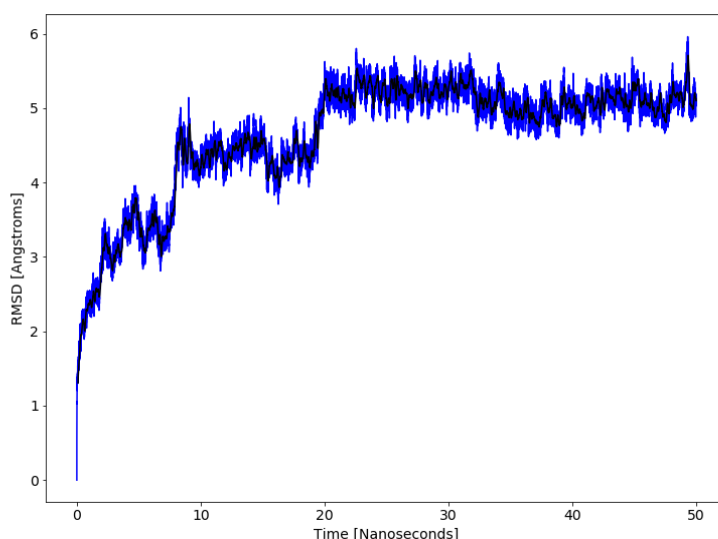

Figure S1 – RMSD of frames included in MD simulation with respect to the initial frame

## Degree, Betweenness-centrality and Closeness-centrality of Trypsin Residues in the Protein Energy Network Constructed by gRINN

Note that due to the usage of residue insertion codes in chain E (trypsin) of PDB entry 3OTJ (GLY184A, GLY188A, ALA221A), residue numbering was changed to be able to take inserted residues into protein topology in MD simulation. This results in differences between residues numbers in the original PDB file and those reported by gRINN. The following table (Table S1) includes both (Residue (gRINN): Reported by gRINN, Residue (3OTJ): as in 3OTJ). The numbering in 3OTJ was used in the Main Text.

Table S1 – Degree, Betweenness-centrality and Closeness-centrality of trypsin residues in the constructed PEN

| Residue (gRINN) | Residue (3OTJ) | Degree | Betweenness-centrality | Closeness-centrality |
|-----------------|----------------|--------|------------------------|----------------------|
| EILE16          | EILE16         | 36     | 0.0862174392           | 0.5759809417         |
| EVAL17          | EVAL17         | 19     | 0.0009783539           | 0.4346153976         |
| EGLY18          | EGLY18         | 12     | 0.0011414129           | 0.4079503652         |
| EGLY19          | EGLY19         | 15     | 0.0016305899           | 0.4221127703         |
| ETYR20          | ETYR20         | 16     | 0.0011414129           | 0.4248255776         |
| ETHR21          | ETHR21         | 17     | 0.002894297            | 0.4333552397         |
| ECYS22          | ECYS22         | 16     | 0.0004076475           | 0.4049245434         |
| EGLY23          | EGLY23         | 12     | 0.0030981207           | 0.4009774831         |
| EALA24          | EALA24         | 15     | 0.0025274143           | 0.4092084671         |
| EASN25          | EASN25         | 22     | 0.0033019445           | 0.4557159338         |
| ETHR26          | ETHR26         | 17     | 0.0008560597           | 0.4120749323         |
| EVAL27          | EVAL27         | 24     | 0.0069707717           | 0.4729698334         |
| EPRO28          | EPRO28         | 21     | 0.0068484774           | 0.4523812702         |
| ETYR29          | ETYR29         | 30     | 0.0204639028           | 0.5054754787         |
| EGLN30          | EGLN30         | 31     | 0.0184256655           | 0.499506353          |
| EVAL31          | EVAL31         | 32     | 0.0214830215           | 0.5046121158         |
| ESER32          | ESER32         | 29     | 0.0112103053           | 0.4803699786         |
| ELEU33          | ELEU33         | 25     | 0.0108026579           | 0.4891956884         |
| EASN34          | EASN34         | 25     | 0.0067261832           | 0.4310701748         |
| ESER37          | ESER37         | 12     | 0.0001222942           | 0.4291074829         |
| EGLY38          | EGLY38         | 9      | 0.0003668827           | 0.3625758657         |
| ETYR39          | ETYR39         | 16     | 0.0026904733           | 0.3982943773         |
| EHSD40          | EHSD40         | 24     | 0.0123517182           | 0.4792797831         |
| EPHE41          | EPHE41         | 21     | 0.003057356            | 0.4622470133         |
| ECYS42          | ECYS42         | 24     | 0.0071745954           | 0.4960620984         |
| EGLY43          | EGLY43         | 21     | 0.0126370715           | 0.4806929722         |
| EGLY44          | EGLY44         | 26     | 0.0114141291           | 0.4794344717         |

|        |        |    |              |              |
|--------|--------|----|--------------|--------------|
| ESER45 | ESER45 | 21 | 0.0030981207 | 0.4523277557 |
| ELEU46 | ELEU46 | 23 | 0.0081937141 | 0.4812224747 |
| EILE47 | EILE47 | 22 | 0.0065223595 | 0.4416440178 |
| EASN48 | EASN48 | 20 | 0.0044433574 | 0.4302991856 |
| ESER49 | ESER49 | 17 | 0.0015898251 | 0.411074142  |
| EGLN50 | EGLN50 | 16 | 0.0023643553 | 0.3923492916 |
| ETRP51 | ETRP51 | 27 | 0.0126370715 | 0.4576860457 |
| EVAL52 | EVAL52 | 26 | 0.0106803636 | 0.4938986178 |
| EVAL53 | EVAL53 | 26 | 0.0101911867 | 0.4964493024 |
| ESER54 | ESER54 | 26 | 0.0254779667 | 0.5009303706 |
| EALA55 | EALA55 | 22 | 0.0097835392 | 0.4826751184 |
| EALA56 | EALA56 | 17 | 0.0041172394 | 0.4511396405 |
| EHSD57 | EHSD57 | 17 | 0.0089274795 | 0.453060186  |
| ECYS58 | ECYS58 | 19 | 0.0037095919 | 0.461771266  |
| ETYR59 | ETYR59 | 16 | 0.0028535323 | 0.414016159  |
| ELYS60 | ELYS60 | 23 | 0.0089274795 | 0.4602697011 |
| ESER61 | ESER61 | 8  | 0.0004076475 | 0.3722726396 |
| EGLY62 | EGLY62 | 5  | 0.0004484122 | 0.3683919412 |
| EILE63 | EILE63 | 19 | 0.008682891  | 0.4584790945 |
| EGLN64 | EGLN64 | 23 | 0.0058293588 | 0.4194278239 |
| EVAL65 | EVAL65 | 24 | 0.0074191839 | 0.4711231094 |
| EARG66 | EARG66 | 33 | 0.0233174351 | 0.4946184819 |
| ELEU67 | ELEU67 | 22 | 0.0041580042 | 0.4394355249 |
| EGLY69 | EGLY69 | 19 | 0.0022012963 | 0.4174576837 |
| EGLU70 | EGLU70 | 29 | 0.0328563858 | 0.5034990129 |
| EASP71 | EASP71 | 34 | 0.0259263789 | 0.4853355706 |
| EASN72 | EASN72 | 20 | 0.0015490604 | 0.4097326061 |
| EILE73 | EILE73 | 13 | 0.0020382373 | 0.4283875151 |
| EASN74 | EASN74 | 11 | 0.0005707065 | 0.3868934994 |
| EVAL75 | EVAL75 | 14 | 0.0006522359 | 0.3794852137 |
| EVAL76 | EVAL76 | 8  | 0.0003668827 | 0.3751315189 |
| EGLU77 | EGLU77 | 21 | 0.0083160083 | 0.4498926739 |
| EGLY78 | EGLY78 | 6  | 0            | 0.3636005217 |
| EASN79 | EASN79 | 14 | 0.0006114712 | 0.3901575892 |
| EGLU80 | EGLU80 | 21 | 0.0101911867 | 0.4378075788 |
| EGLN81 | EGLN81 | 19 | 0.002894297  | 0.4249653317 |
| EPHE82 | EPHE82 | 16 | 0.0008152949 | 0.4045428496 |
| EILE83 | EILE83 | 22 | 0.0041987689 | 0.4166006417 |
| ESER84 | ESER84 | 19 | 0.0015898251 | 0.391233151  |

|         |         |    |                   |              |
|---------|---------|----|-------------------|--------------|
| EALA85  | EALA85  | 12 | 0.0014675309      | 0.3827979572 |
| ESER86  | ESER86  | 11 | 0.0011414129      | 0.3644027607 |
| ELYS87  | ELYS87  | 17 | 0.0183033712      | 0.4134899329 |
| ESER88  | ESER88  | 19 | 0.0048917696      | 0.4165591868 |
| EILE89  | EILE89  | 10 | 0.0021197668      | 0.4059765509 |
| EVAL90  | EVAL90  | 17 | 0.003383474       | 0.4140525736 |
| EHSD91  | EHSD91  | 18 | 0.0165504871      | 0.4259249086 |
| EPRO92  | EPRO92  | 9  | 0.0010191187      | 0.3836596966 |
| ESER93  | ESER93  | 9  | 0.0017936489      | 0.3708941887 |
| ETYR94  | ETYR94  | 12 | 0.0061554767      | 0.3992908149 |
| EASN95  | EASN95  | 10 | 0.008682891       | 0.3894859966 |
| ESER96  | ESER96  | 6  | 0                 | 0.3272912911 |
| EASN97  | EASN97  | 4  | 4.07647466471E-05 | 0.2952603874 |
| ETHR98  | ETHR98  | 8  | 0.0034650035      | 0.3475811032 |
| ELEU99  | ELEU99  | 9  | 0.0039541804      | 0.388858558  |
| EASN100 | EASN100 | 10 | 0.0021197668      | 0.3662163142 |
| EASN101 | EASN101 | 21 | 0.0164689576      | 0.4461901137 |
| EASP102 | EASP102 | 21 | 0.0452896335      | 0.5080244488 |
| EILE103 | EILE103 | 20 | 0.0112510701      | 0.4776559646 |
| EMET104 | EMET104 | 18 | 0.0031388855      | 0.4290550689 |
| ELEU105 | ELEU105 | 20 | 0.0076637724      | 0.4400023883 |
| EILE106 | EILE106 | 23 | 0.0105988341      | 0.4844087171 |
| ELYS107 | ELYS107 | 14 | 0.0014675309      | 0.4045255415 |
| ELEU108 | ELEU108 | 20 | 0.003546533       | 0.4237900902 |
| ELYS109 | ELYS109 | 18 | 0.0011414129      | 0.4122813944 |
| ESER110 | ESER110 | 15 | 0.0024866495      | 0.3884453022 |
| EALA111 | EALA111 | 14 | 0.0010191187      | 0.3911082011 |
| EALA112 | EALA112 | 11 | 0.0003668827      | 0.4010467455 |
| ESER113 | ESER113 | 13 | 0.0010191187      | 0.3969318237 |
| ELEU114 | ELEU114 | 13 | 0.0014267661      | 0.3774065863 |
| EASN115 | EASN115 | 10 | 0.0015490604      | 0.3812204933 |
| ESER116 | ESER116 | 8  | 0.000489177       | 0.384805906  |
| EARG117 | EARG117 | 22 | 0.018018018       | 0.4537298531 |
| EVAL118 | EVAL118 | 18 | 0.0046064164      | 0.4259436145 |
| EALA119 | EALA119 | 19 | 0.0051363581      | 0.4418408941 |
| ESER120 | ESER120 | 12 | 0.0033427092      | 0.4202702966 |
| EILE121 | EILE121 | 22 | 0.0128816599      | 0.4414069186 |
| ESER122 | ESER122 | 17 | 0.0098243039      | 0.4340165601 |
| ELEU123 | ELEU123 | 10 | 0.0012229424      | 0.3988053692 |

|         |         |    |                   |              |
|---------|---------|----|-------------------|--------------|
| EPRO124 | EPRO124 | 7  | 0.0004484122      | 0.3492747008 |
| ETHR125 | ETHR125 | 5  | 0.0010191187      | 0.3538725586 |
| ESER127 | ESER127 | 8  | 0.0047694754      | 0.3711242205 |
| ECYS128 | ECYS128 | 9  | 0.0041172394      | 0.3750337572 |
| EALA129 | EALA129 | 7  | 0.0033019445      | 0.3722233338 |
| ESER130 | ESER130 | 6  | 0.0007745302      | 0.3346551664 |
| EALA132 | EALA132 | 10 | 0.0014267661      | 0.3612336251 |
| EGLY133 | EGLY133 | 7  | 0.0033427092      | 0.3767538448 |
| ETHR134 | ETHR134 | 8  | 0.0011414129      | 0.3563194245 |
| EGLN135 | EGLN135 | 12 | 0.0015082956      | 0.3798374587 |
| ECYS136 | ECYS136 | 15 | 0.012392483       | 0.4578805823 |
| ELEU137 | ELEU137 | 15 | 0.0081121846      | 0.4482467818 |
| EILE138 | EILE138 | 19 | 0.0086013615      | 0.467891639  |
| ESER139 | ESER139 | 28 | 0.0094574212      | 0.491568892  |
| EGLY140 | EGLY140 | 20 | 0.0060331825      | 0.4688339532 |
| ETRP141 | ETRP141 | 32 | 0.012066365       | 0.4880562365 |
| EGLY142 | EGLY142 | 15 | 0.0005707065      | 0.4353006632 |
| EASN143 | EASN143 | 15 | 0.000489177       | 0.4313257258 |
| ETHR144 | ETHR144 | 16 | 0.0014267661      | 0.4284827869 |
| ELYS145 | ELYS145 | 13 | 0.0006930007      | 0.4104985277 |
| ESER146 | ESER146 | 10 | 0.0004076475      | 0.4134067278 |
| ESER147 | ESER147 | 6  | 0.0002038237      | 0.3816643241 |
| EGLY148 | EGLY148 | 5  | 4.07647466471E-05 | 0.4021441287 |
| ETHR149 | ETHR149 | 8  | 0.0006930007      | 0.3898126407 |
| ESER150 | ESER150 | 11 | 0.0017528841      | 0.4167704313 |
| ETYR151 | ETYR151 | 15 | 0.0014675309      | 0.4039781488 |
| EPRO152 | EPRO152 | 13 | 0.000326118       | 0.4245280143 |
| EASP153 | EASP153 | 22 | 0.0049325343      | 0.4480257294 |
| EVAL154 | EVAL154 | 18 | 0.0037503567      | 0.451293677  |
| ELEU155 | ELEU155 | 25 | 0.0031388855      | 0.4655201521 |
| ELYS156 | ELYS156 | 21 | 0.0097020097      | 0.470161052  |
| ECYS157 | ECYS157 | 19 | 0.0019567078      | 0.4511508143 |
| ELEU158 | ELEU158 | 23 | 0.0040357099      | 0.4610156961 |
| ELYS159 | ELYS159 | 22 | 0.0133300722      | 0.4684544195 |
| EALA160 | EALA160 | 14 | 0.0043618279      | 0.4169493581 |
| EPRO161 | EPRO161 | 12 | 0.0013044719      | 0.3700241257 |
| EILE162 | EILE162 | 16 | 0.0046064164      | 0.3891943745 |
| ELEU163 | ELEU163 | 11 | 0.0008560597      | 0.3658164798 |
| ESER164 | ESER164 | 12 | 0.0026497085      | 0.3708978355 |

|         |          |    |              |              |
|---------|----------|----|--------------|--------------|
| EASP165 | EASP165  | 23 | 0.0285760874 | 0.4069136933 |
| ESER166 | ESER166  | 8  | 0.0009375892 | 0.3515791203 |
| ESER167 | ESER167  | 11 | 0.0053401818 | 0.3677069553 |
| ECYS168 | ECYS168  | 15 | 0.0016305899 | 0.3630902238 |
| ELYS169 | ELYS169  | 11 | 0.0016305899 | 0.3691049438 |
| ESER170 | ESER170  | 9  | 0.0008968244 | 0.3264512136 |
| EALA171 | EALA171  | 8  | 0.0006522359 | 0.3381866782 |
| ETYS172 | ETYS172  | 12 | 0.0026904733 | 0.3690710096 |
| EPRO173 | EPRO173  | 7  | 0            | 0.2858809631 |
| EGLY174 | EGLY174  | 6  | 0.0011414129 | 0.3086776772 |
| EGLN175 | EGLN175  | 11 | 0.0054217113 | 0.3547351491 |
| EILE176 | EILE176  | 10 | 0.0006522359 | 0.3573221512 |
| ETHR177 | ETHR177  | 12 | 0.0013452366 | 0.3478110537 |
| ESER178 | ESER178  | 7  | 0.0013860014 | 0.3380250652 |
| EASN179 | EASN179  | 18 | 0.0152052505 | 0.4045702854 |
| EMET180 | EMET180  | 18 | 0.0125147772 | 0.4125220358 |
| EPHE181 | EPHE181  | 18 | 0.0172027231 | 0.4683163646 |
| ECYS182 | ECYS182  | 17 | 0.0120256003 | 0.4467259807 |
| EALA183 | EALA183  | 14 | 0.0013044719 | 0.4425290411 |
| EGLY184 | EGLY184A | 14 | 0.003546533  | 0.4382080874 |
| ETYS185 | ETYS185  | 17 | 0.0057478293 | 0.4006062452 |
| ELEU186 | ELEU186  | 11 | 0.0048102401 | 0.4020639897 |
| EGLU187 | EGLU187  | 22 | 0.0165912519 | 0.4597855115 |
| EGLY188 | EGLY188  | 13 | 0.0027720028 | 0.437138847  |
| EGLY189 | EGLY188A | 16 | 0.0049325343 | 0.4574720698 |
| ELYS190 | ELYS188  | 43 | 0.1653010477 | 0.6079771644 |
| EASP191 | EASP189  | 21 | 0.0986506869 | 0.5765715334 |
| ESER192 | ESER190  | 13 | 0.0006522359 | 0.4295098543 |
| ECYS193 | ECYS191  | 9  | 0.000326118  | 0.4132802781 |
| EGLN194 | EGLN192  | 27 | 0.0096204802 | 0.4870543597 |
| EGLY195 | EGLY193  | 15 | 0.0021605316 | 0.4724157507 |
| EASP196 | EASP194  | 27 | 0.0875626758 | 0.605795525  |
| ESER197 | ESER195  | 21 | 0.0136154254 | 0.502142046  |
| EGLY198 | EGLY196  | 16 | 0.0087236558 | 0.4848135302 |
| EGLY199 | EGLY197  | 13 | 0.0089274795 | 0.4646964941 |
| EPRO200 | EPRO198  | 17 | 0.0038318862 | 0.4658783776 |
| EVAL201 | EVAL199  | 17 | 0.0105173046 | 0.4799535591 |
| EVAL202 | EVAL200  | 12 | 0.0072968896 | 0.4270355688 |
| ECYS203 | ECYS201  | 16 | 0.0077453019 | 0.4378886534 |

|         |          |    |                   |              |
|---------|----------|----|-------------------|--------------|
| ESER204 | ESER202  | 15 | 0.0048510049      | 0.4322532426 |
| EGLY205 | EGLY203  | 16 | 0.0068484774      | 0.4396189554 |
| ELYS206 | ELYS204  | 19 | 0.0185887245      | 0.4577237057 |
| ELEU209 | ELEU209  | 18 | 0.0269047328      | 0.4852908072 |
| EGLN210 | EGLN210  | 19 | 0.0062370062      | 0.4165074145 |
| EGLY211 | EGLY211  | 12 | 0.009498186       | 0.4632279494 |
| EILE212 | EILE212  | 16 | 0.0084383026      | 0.4704706916 |
| EVAL213 | EVAL213  | 14 | 0.0166320166      | 0.4571322038 |
| ESER214 | ESER214  | 11 | 0.0044841221      | 0.4481142584 |
| ETRP215 | ETRP215  | 12 | 0.0024051201      | 0.3865605326 |
| EGLY216 | EGLY216  | 11 | 0.0054217113      | 0.425044202  |
| ESER217 | ESER217  | 5  | 0.0002853532      | 0.3515579994 |
| EGLY219 | EGLY219  | 10 | 0.0010191187      | 0.4176717719 |
| ECYS220 | ECYS220  | 9  | 0.0002853532      | 0.4157252802 |
| EALA221 | EALA221A | 12 | 0.0002445885      | 0.4258070098 |
| EGLN222 | EGLN221  | 15 | 0.0012637071      | 0.4203089238 |
| ELYS223 | ELYS222  | 18 | 0.0099465982      | 0.4658259585 |
| EASN224 | EASN223  | 18 | 0.0013860014      | 0.427699507  |
| ELYS225 | ELYS224  | 26 | 0.0476947536      | 0.4775998772 |
| EPRO226 | EPRO225  | 18 | 0.0079898903      | 0.4440177828 |
| EGLY227 | EGLY226  | 13 | 0.0080306551      | 0.4587706207 |
| EVAL228 | EVAL227  | 21 | 0.0166320166      | 0.4452055308 |
| ETYP229 | ETYP228  | 20 | 0.0143899556      | 0.4431591118 |
| ETHR230 | ETHR229  | 17 | 0.0125147772      | 0.4282162447 |
| ELYS231 | ELYS230  | 27 | 0.0438628674      | 0.4672170576 |
| EVAL232 | EVAL231  | 9  | 0.002731238       | 0.3950734832 |
| ECYS233 | ECYS232  | 10 | 0.0016305899      | 0.3723787818 |
| EASN234 | EASN233  | 15 | 0.0059924178      | 0.3957393963 |
| ETYP235 | ETYP234  | 12 | 0.0028535323      | 0.3489826034 |
| EVAL236 | EVAL235  | 10 | 0.0017121194      | 0.3455347985 |
| ESER237 | ESER236  | 13 | 0.0055032408      | 0.3848534622 |
| ETRP238 | ETRP237  | 10 | 0.0021605316      | 0.3541914675 |
| EILE239 | EILE238  | 9  | 0.0009375892      | 0.3497070587 |
| ELYS240 | ELYS239  | 10 | 0.0020790021      | 0.3470172112 |
| EGLN241 | EGLN240  | 12 | 0.0023235906      | 0.3699079247 |
| ETHR242 | ETHR241  | 8  | 4.07647466471E-05 | 0.3265835014 |
| EILE243 | EILE242  | 6  | 0.000326118       | 0.3215168712 |
| EALA244 | EALA243  | 7  | 0.0013860014      | 0.3357888193 |
| ESER245 | ESER244  | 8  | 0.0039949452      | 0.3345647929 |

|         |         |   |              |              |
|---------|---------|---|--------------|--------------|
| EASN246 | EASN245 | 5 | 0.0028535323 | 0.3422353982 |
|---------|---------|---|--------------|--------------|
